1 **Neural Correlates of Statistical Learning in**  
2 **Developmental Dyslexia: An Electroencephalography**  
3 **Study**

4

5 **Short title:** Statistical Learning in Developmental Dyslexia

6

7 Tatsuya Daikoku<sup>1,2\*</sup>, Sebastian Jentschke<sup>3</sup>, Vera Tsogli<sup>4</sup>, Kirstin Bergström<sup>5</sup>, Thomas  
8 Lachmann<sup>5,6</sup>, Merav Ahissar<sup>7</sup>, and Stefan Koelsch<sup>1,4</sup>

9

10 <sup>1</sup>Department of Neuropsychology, Max Planck Institute for Human Cognitive and Brain  
11 Sciences, Leipzig, Germany

12 <sup>2</sup>International Research Center for Neurointelligence (WPI-IRCN), UTIAS, The  
13 University of Tokyo, Tokyo, Japan

14 <sup>3</sup>Department of Psychosocial Science, University of Bergen, Bergen, Norway

15 <sup>4</sup>Department for Biological and Medical Psychology, University of Bergen, Bergen,  
16 Norway

17 <sup>5</sup>Center for Cognitive Science, University of Kaiserslautern, Kaiserslautern, Germany

18 <sup>6</sup> Centro de Investigación Nebrija en Cognición, Universidad Nebrija, Madrid (Spain)

19 <sup>7</sup>Psychology Department, Hebrew University, Jerusalem, Israel

20

21 \*Correspondence to: [daikoku.tatsuya@mail.u-tokyo.ac.jp](mailto:daikoku.tatsuya@mail.u-tokyo.ac.jp)

22

23

24

## 25 **Conflict of Interest**

26 The authors declare no competing financial interests.

27

## 28 **Acknowledgements**

29 This study was supported by the German-Israeli Foundation for Scientific Research and  
30 Development and World Premier International Research Centre Initiative (WPI), MEXT,  
31 and JSPS KAKENHI Grant Number 20K22676, Japan. The sponsors played no role in the  
32 study design; the collection, analysis, and interpretation of the data; or the writing of the  
33 manuscript.

## 34 **Abstract**

35

36 The human brain extracts statistical regularities from the surrounding environment in a  
37 process referred to as statistical learning. Recent behavioural evidence suggests that  
38 developmental dyslexia affects statistical learning. However, surprisingly few  
39 neurophysiological studies have assessed how developmental dyslexia affects the  
40 neural processing underlying statistical learning. In this study, we used  
41 electroencephalography to explore the neural correlates of an important aspect of  
42 statistical learning - sensitivity to transitional probabilities - in individuals with  
43 developmental dyslexia. Adults diagnosed with developmental dyslexia (n = 17) and  
44 controls (n = 19) were exposed to a continuous stream of sound triplets in which a few  
45 triplet endings were location deviants (i.e., were presented from an unexpected speaker  
46 direction) or statistical deviants (i.e., had a low transitional probability given the  
47 triplet's first two sounds). Location deviants elicited a large location mismatch  
48 negativity (MMN), which was larger in controls than dyslexics. Statistical deviants  
49 elicited a small, yet significant statistical MMN (sMMN) in controls, whereas the dyslexic  
50 individuals did not exhibit a statistical MMN. These results suggest that the neural  
51 mechanisms underlying statistical learning are impaired in developmental dyslexia.

52 **Significance statement**

53 We assessed the neural correlates of statistical learning in individuals with  
54 developmental dyslexia. Statistical deviants, namely word endings with a low  
55 transitional probability (as compared to high probability transitions) elicited a small,  
56 yet significant statistical MMN in controls, whereas the dyslexic individuals did not  
57 exhibit a statistical MMN. Location deviants elicited a MMN, which was larger in  
58 controls than dyslexics. These results suggest that the neural mechanisms underlying  
59 statistical learning are impaired in developmental dyslexia.

## 60 **Introduction**

61           The brain can identify statistical regularities in sequential information in a  
62 process known as statistical learning (Saffran, Aslin, & Newport, 1996) or implicit  
63 learning (Perruchet & Pacton, 2006). Statistical learning involves an implicit and innate  
64 mechanism by which the brain calculates the transitional probability of sequential  
65 information. This learning system is thought to play a crucial role in early language  
66 acquisition. For example, 8-month-old infants (Saffran, Aslin, & Newport, 1996) and  
67 neonates (Teinonen et al., 2009) can learn the probabilities of syllable transitions, thus  
68 enabling them to detect word boundaries and isolate single words in natural speech.

69

70           Developmental dyslexia impairs reading comprehension and spelling in  
71 language, and is thought to arise mainly from phonological perceptual difficulties  
72 (Snowling, 2000; Ramus et al., 2003; Vellutino et al., 2004). In addition, individuals with  
73 developmental dyslexia may further have a wide range of other nonlinguistic as well as  
74 linguistic impairments, including weakened auditory statistical learning abilities  
75 (Arciuli & Simpson, 2012; Du & Kelly, 2013; Evans, Saffran, & Robe-Torres, 2009;  
76 Howard, Howard, Japikse, & Eden, 2006; Menghini, Hagberg, Caltagirone, Petrosini, &  
77 Vicari, 2006; Vicari et al., 2005) and non-linguistic perceptual processing (Ahissar,  
78 Protopapas, Reid, & Merzenich, 2000; Christmann, Lachmann, & Steinbrink, 2015;  
79 Giraud & Ramus, 2013; McAnally & Stein, 1996; Sperling, Lu, Manis, & Seidenberg,  
80 2005). Since phonological deficits can also be observed in people without  
81 developmental dyslexia (Huettig et al., 2017), and not all children with developmental  
82 dyslexia show phonological processing deficits (Lachmann & van Leeuwen, 2008;  
83 Morris et al., 1998), phonological deficits may not automatically lead to developmental

84 dyslexia. Thus, at least in some individuals, developmental dyslexia may also have other  
85 causes.

86

87         One possible cause is a more domain-general statistical learning deficit, not  
88 specific to phonological processing. Particularly, a great deal of evidence has shown that  
89 auditory statistical learning is impaired in dyslexic children, adolescents, and adults  
90 (Gabay et al., 2015; Dobo et al., 2021; Kahta et al., 2019; Vandermosten et al., 2019),  
91 although some other studies suggest that children with and without developmental  
92 dyslexia had no difference in statistical learning performance (Witteloostuijn et al.,  
93 2019). Despite much behavioral evidence on statistical learning deficits, the underlying  
94 neural mechanisms of these deficits remain unclear. This study aimed to investigate the  
95 neural correlates of statistical learning in individuals with developmental dyslexia using  
96 electroencephalography (EEG), which exhibits a high sensitivity to capture statistical  
97 learning even when behavioural measures may not indicate learning effects (Koelsch,  
98 Busch, Jentschke, & Rohrmeier, 2016).

99

100         EEG can be used to measure neural activity during statistical learning.  
101 Particularly, statistical learning is reflected in the electric brain responses to stimulation  
102 (event-related potentials, ERPs). When the brain encodes the statistics of stimulus  
103 sequences (e.g. regularities occurring within stimulus sequences), it predicts high-  
104 probability stimuli, which is associated with an inhibited ERP response to the predicted  
105 stimuli (compared with unpredicted, i.e., irregular or less regular, stimuli). Statistical  
106 learning effects can thus manifest as differences in ERP response amplitudes for  
107 expected and unexpected stimuli (for review, see Daikoku, 2018). Many studies have  
108 suggested that statistical learning is reflected in both early ERP components such as

109 auditory brainstem response (ABR; Skoe, et al., 2015), P50 (Daikoku et al., 2017;  
110 Paraskevopoulos et al., 2012), N100 (Sanders et al., 2002), and mismatch negativity  
111 (MMN; Koelsch et al., 2016; Moldwin, Schwartz, & Sussman, 2017) as well as later ERP  
112 components such as the P200 (Balaguer et al., 2007; Cunillera et al., 2006) and the N400:  
113 (François, et al., 2013). Typically, a mismatch negativity (MMN) is elicited in response to  
114 physical deviants in oddball sequences. In such experiments, a series of standard stimuli  
115 is interspersed with physical deviants (oddballs; e.g, sound differing in pitch or location  
116 deviants; Christmann, Lachmann, & Berti, 2014; Garrido et al., 2008; Rinne, Antila, &  
117 Winkler, 2001; Sussman, Winkler, & Schröger, 2003; Winkler & Czigler, 2012). For  
118 example, if several sounds are presented from the right side, a sound presented on the  
119 left side elicits an MMN, which is generated mainly in the auditory cortex (Garrido et al.,  
120 2008).

121

122       Because developmental dyslexia is related to sensory processing dysfunctions,  
123 including those of the auditory cortex (Clark et al., 2014; Goswami, 2014; for a review  
124 see Gu & Bi, 2020), the MMN has been used to investigate the neural basis of  
125 developmental dyslexia (Kujala et al., 2000). A reduced MMN amplitude in children  
126 (Lachmann et al., 2005; for an overview see Bishop, 2007) and young adults (Schulte-  
127 Körne et al., 2001) with developmental dyslexia reflected impaired performance in  
128 syllable and tone discrimination and impaired tuning to native language speech  
129 representations (Bruder et al., 2011). The MMN has therefore been suggested as a  
130 neurophysiological endophenotype for developmental dyslexia (Neuhoff et al., 2012).  
131 However, there is also one study suggesting that only certain aspects of auditory  
132 processing may be affected: whereas the pitch MMN was shown to be impaired in that  
133 study, was the location MMN enhanced (Kujala et al., 2006). Notably, such MMN effects

134 to physical changes do not require statistical learning because the perceptual  
135 regularities underlying the generation of the classical MMN can be extracted on a  
136 moment-to-moment basis, such as a series of stimuli coming from the right side  
137 interrupted by a stimulus from the left side. However, statistical learning can also be  
138 reflected in the MMN (François, Cunillera, Garcia, Laine, & Rodriguez-Fornells, 2017;  
139 Koelsch et al., 2016; Moldwin et al., 2017). Tsogli, Jentschke, Daikoku, and Koelsch  
140 (2019) presented sequences of tone triplets that could contain location deviants  
141 (comprising stimuli from an irregular location) and statistical deviants (comprising  
142 triplet endings with a low probability given the two preceding triplet items; this low  
143 transition probability could only be represented based on statistical learning, i.e., after  
144 extensive exposure to many triplets). Both statistical and location deviants elicited  
145 prominent mismatch ERP responses approximately 150–250 ms after stimulus onset.  
146 ERP effects elicited by statistical deviants are termed statistical MMN (sMMN; Koelsch  
147 et al., 2016) to distinguish them from the MMN to physical deviance, e.g., elicited by  
148 location deviants (Paavilainen, Karlsson, Reinikainen, & Näätänen, 1989; Sams,  
149 Paavilainen, Alho, & Näätänen, 1985). In contrast to the MMN elicited by physical  
150 deviance, the elicitation of the sMMN does not occur on a moment-to-moment basis.  
151 Instead, it requires a more extended learning period to encode the underlying statistical  
152 regularities and to store them in long-term memory. Thus, the sMMN is suitable to  
153 investigate acquisition of knowledge regarding the statistical regularity of sound  
154 sequences.

155

156 This study investigated how developmental dyslexia affects the classical MMN in  
157 response to location deviants and the sMMN in response to statistical deviants in adults.  
158 Assuming that dyslexia adversely affects the inferences of sensory statistics in the



159 auditory cortex (Jaffe-Dax, Kimel, & Ahissar, 2018; Lieder et al., 2019), we hypothesised  
160 that statistical and location deviants would elicit weaker MMNs in participants with  
161 developmental dyslexia than the controls. Confirmation of this hypothesis would  
162 provide evidence that developmental dyslexia is associated with both auditory  
163 processing dysfunction and statistical learning of auditory sequences.

164

## 165 **Materials and Methods**

### 166 *Participants*

167 Twenty-one adults diagnosed with developmental dyslexia (11 females, mean  
168 age = 26 years, SD = 5.3) and 20 age- and gender-matched control participants without a  
169 diagnosis of dyslexia (14 females, mean age = 26 years, SD = 3.1) were screened for  
170 eligibility to participate in this study. We excluded one individual from the  
171 developmental dyslexia group and one from the control group because both performed  
172 in the nonverbal intelligence test Standard Progressive Matrices (Raven & Court, 1998)  
173 with an IQ score < 70 (two SD below the normal range). Three other individuals with  
174 developmental dyslexia were excluded because they did not receive a clear diagnosis in  
175 childhood. After these exclusions, our study sample included 17 adults with  
176 developmental dyslexia and 19 control participants (Table 1), who all met the following  
177 inclusion criteria: German as the native language, right-handedness (Edinburgh  
178 Inventory; Oldfield, 1971), no history of neurological or audiological disorders, no  
179 diagnosis of a general or specific language impairment, no mental retardation, and no  
180 formal musical training for more than 5 years (beyond regular school lessons).

181

182           The study protocol was approved by the Ethics Committee of the Max-Planck-  
183 Institute (approval number: 2018/352). All participants were informed of the purpose  
184 of the study and the procedures in place to ensure their safety and the confidentiality of  
185 their personal data. They all provided written informed consent to participate in this  
186 study.

187

### 188 ***Evaluation of Spelling and Reading Skills***

189           Spelling skills were assessed with the Rechtschreibtest (Ibrahimović & Bulheller,  
190 2013). In this test, participants were asked to fill in the missing words of a text, mainly  
191 composed of irregular German words, that a skilled and German native speaking  
192 experimenter read aloud. Silent text reading speeds and reading comprehension skills  
193 were assessed with the Lesegeschwindigkeits-und Verständnistest für die Klassen 5–12  
194 (LVGT 5–12; Schneider, Schlagmüller, & Ennemoser, 2017). In this test, participants  
195 were asked to read as much of the text as possible within 4 min and to fill in each gap in  
196 the text with one of the three possible options.

197

### 198 ***Stimuli***

#### 199 *Sounds*

200           We used the same stimuli and sequences as in a previous study (Tsogli et al.,  
201 2019). Each sound consisted of a Shepard tone (Shepard, 1964), combined with the  
202 sound produced by one of six different percussion instruments (i.e., a surdo, a  
203 tambourine, agogô bells, a hi-hat, castanets, or a woodblock). We obtained the  
204 percussive sounds from the Philharmonia Orchestra website  
205 ([http://www.philharmonia.co.uk/explore/sound\\_samples](http://www.philharmonia.co.uk/explore/sound_samples)). We used six distinct

206 Shepard tones based on six frequencies (i.e., F<sub>3</sub> [174.61 Hz], G<sub>3</sub> [196.00 Hz], A<sub>3</sub> [220.00  
207 Hz], B<sub>3</sub> [246.94 Hz], C<sub>4</sub> [277.18 Hz], and D<sub>4</sub> [311.13 Hz]), each tone resulting from the  
208 superposition of nine sinusoidal components spaced an octave apart. The specific  
209 combinations of Shepard tones and percussive sounds were counterbalanced across  
210 participants. Examples of sounds are provided in Appendix A.

211

212 Another set of six sound combinations was created for a practice phase at the  
213 start of each experiment. These sounds were similar to those used in the main  
214 experiment but differed in terms of the frequencies providing bases for Shepard tones  
215 (i.e., E<sub>3</sub> [164.81 Hz], F<sub>3</sub> [184.99 Hz], G<sub>3</sub> [207.65 Hz], A<sub>3</sub> [233.08 Hz], C<sub>4</sub> [261.62 Hz],  
216 and D<sub>4</sub> [293.66 Hz]) and the percussive sounds used (i.e., the sounds of a woodblock, a  
217 tambourine, agogô bells, castanets, a hi-hat, and a bass drum). An additional target  
218 Shepard tone based on C<sub>5</sub> (554.37 Hz), that did not have an accompanying percussive  
219 sound, was used for a cover task and a passive listening component of the experimental  
220 procedure (see Experimental Procedure).

221 All sound stimuli had a tone duration of 220 ms, including rising and falling  
222 periods of 10 ms and 20 ms, respectively, a constant loudness, and a sampling frequency  
223 of 44,100 Hz with 16 bit resolution.

224

### 225 *Triplet Sequences*

226 The stimuli described above, hereafter referred to as sounds A to F, were  
227 combined into sound triplets. Each 220 ms sound was followed by an 80 ms pause, such  
228 that the total duration of each triplet was 900 ms. As shown in Figure 1, sounds A and B  
229 and sounds C and D were paired to create two distinct two-sound sequences (i.e., AB  
230 and CD) that served as the first two sounds of each triplet, which are hereafter referred

231 to as the triplet roots. Sounds E and F were the sounds that could be used as the last  
232 sound of a triplet, which is hereafter referred to as the triplet ending. Combining the  
233 two roots and two triplet endings yielded four possible triplets (i.e., ABE, ABF, CDE, and  
234 CDF). The assignment of different sounds to roles as triplet roots or endings was  
235 counterbalanced across participants as a way of ensuring that any possible acoustical  
236 differences between sounds would be cancelled out through participants and not bias  
237 the neural responses of interest.

238

239 **Exposition Sequences.** The sequence of sounds used during an exposition phase  
240 comprised 400 sound triplets with a total sequence duration of about 6 min. The triplets  
241 were presented in a pseudo-randomised order with no two sequentially adjacent  
242 triplets being identical. Each of the two roots had an equal probability of occurring in a  
243 given triplet regardless of the ending sound of the previous triplet. Each statistically  
244 deviant triplet was followed by at least 3 triplets that were not statistically deviant.

245

246 Each sound stimulus was presented from either a speaker to the participant's  
247 right or a speaker to the participant's left. These speakers were positioned at 60° angles  
248 in the azimuthal plane. For each participant, one side was pseudo-randomly selected as  
249 the standard side for stimuli to be presented from, and the other side was the deviant  
250 one. The lateralization of the stimuli was balanced across blocks and counterbalanced  
251 between participants, and whether the location was "standard" or "deviant" was  
252 considered in the data analyses. For the triplet root sounds (i.e., sounds A, B, C, and D),  
253 95% of the stimuli were presented from the standard side and the remaining 5% from  
254 the deviant side. For the triplet endings (i.e., sounds E and F), 80% of the stimuli were  
255 presented from the standard side and the remaining 20% from the deviant side. The

256 triplets with endings presented from the deviant side were considered location  
257 deviants.

258

259 To generate statistical deviants, we set distinct probabilities for a transition (i.e.,  
260 transitional probability) from a given root to a given ending within a triplet. The  
261 sensitivity to transitional probability is one of the important aspects of statistical  
262 learning mechanisms (Perruchet & Pacton, 2006; Saffran, Aslin, & Newport, 1996). The  
263 transitional probability for a given triplet ending was either 90% or 10% depending on  
264 root identity (Figure 1a). Triplets containing low-probability root-to-ending transitions  
265 were considered statistical deviants. Each statistically deviant triplet was followed by  
266  $\geq 3$  triplets that were not statistically deviant. The location and statistical deviance  
267 created four triplet categories (Table 2). That is, standard triplets, which accounted for  
268 72% of all triplets, were neither location deviant nor statistically deviant. The remaining  
269 28% of triplets could be statistically deviant only (8% of all triplets), location deviant  
270 only (18% of all triplets), or both statistically deviant and location deviant (2% of all  
271 triplets).

272

273 **Behavioural Testing Sequences.** Each behavioural testing phase of the  
274 experiment consisted of twelve trials, with each trial involving a pair of triplets  
275 separated by a 335-ms pause. The triplets in each pair had the same root but different  
276 endings with low vs. high transition probabilities, respectively (i.e., statistically deviant  
277 vs. not deviant). The order in which the statistically deviant and standard triplets were  
278 played was counterbalanced across trials. Varying the order in which the same-root  
279 triplets within a pair were played created four sequentially distinct pairings (i.e., ABE to  
280 ABF, ABF to ABE, CDE to CDF, and CDF to CDE). Each sequentially distinct pairing was

281 played three times during each behavioural testing phase, and consecutively played  
282 pairings had alternating triplet roots (i.e., each AB pairing was followed by a CD pairing  
283 that was in turn followed by an AB pairing). During behavioural testing phases, all  
284 triplets were played from both speakers, i.e., the task focussed on statistical regularity  
285 whereas location was not a factor.

286

287

288

289

290

291

292

293

294

295

296

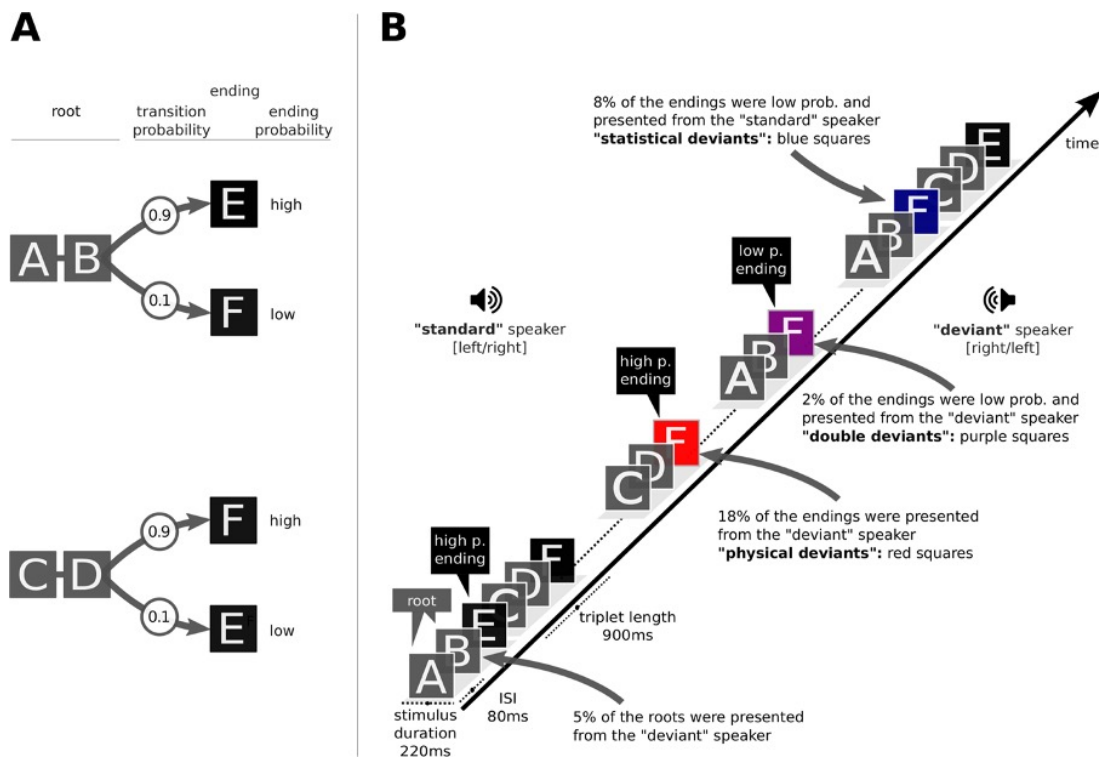

297 **Figure 1. Triplets and stream in this study.** (A) Four types of triplets generated from  
298 six different sounds (designated with letters from A to F) produced by pairing a Shepard  
299 tone with various percussive sounds. Each triplet consists of a root containing two  
300 conserved sounds (AB or CD) and a triplet ending with a high (90%) or a low (10%)  
301 transitional probability given the triplet's root. Each triplet root has a 50% probability  
302 of occurring regardless of the ending sound of the previous triplet. (B) Example of a  
303 possible triplet sequence including standard triplets (triplet endings in black boxes),  
304 triplets with a statistically deviant ending (triplet endings in blue boxes) or a location  
305 deviant ending (triplet ending in red box), and a triplet with a doubly deviant ending  
306 (i.e., statistically deviant and location deviant; triplet ending in purple box). Reprinted,  
307 with permission, from Tsogli et al. (2019). Abbreviations: ISI, inter-stimulus interval; p.  
308 & prob., probability.

## 309 ***Experimental Design***

310           The participants completed a multi-stage experiment with six blocks while  
311 undergoing EEG monitoring (see ‘Collection and Analysis of EEG Data’) inside an  
312 electromagnetically shielded chamber. Immediately before the experiment, the  
313 participants were provided with instructions concerning the procedures for the  
314 experiment’s different phases (see below). To ensure that only implicit learning could  
315 occur, the instructions did not include any description of the possible location or  
316 statistical deviance of the triplets. The participants then completed a 1-min practice  
317 session in which they were asked to press a key as soon as possible after hearing a  
318 target sound (i.e., C<sub>5</sub> [554.37 Hz]). If necessary, each participant repeated the practice  
319 session until they had correctly pressed the key after 80% of the target sound  
320 presentations.

321

322           Each of the six blocks included an exposition phase comprising the passive  
323 listening of the sequence of 400 triplets and a subsequent behavioural testing phase in  
324 which the participants performed actions based on a triplet sequence. During the  
325 exposition phase, participants were instructed to react to the high-pitched tones (cover  
326 tasks, 0.67% of all tones) while they were exposed to the sequence of 400 triplets  
327 described above (see Exposition Sequences). At the same time, they were watching a  
328 silent movie (nature or wildlife documentaries) played on a monitor in front of them.  
329 While the cover task was not particularly demanding (e.g, in terms of attentional  
330 resources) it minimized the possibility of the participants intentionally focusing their  
331 attention on statistical properties.

332



333 During a behavioural testing phase, the participants listened to paired  
334 statistically deviant and standard triplets (see Behavioural Testing Sequences). After  
335 each pair of triplets, a participant was asked to choose which triplet in the pair sounded  
336 more familiar and to rate their confidence in a given answer on a scale ranging from 1  
337 (no certainty) to 5 (certainty).

338

### 339 ***Acquisition and Analysis of EEG Data***

340 We obtained 64-channel EEG data (Brain Amp, Brain Products, Munich,  
341 Germany) through cap-mounted electrodes placed over the participants' scalps in  
342 accordance with the extended international 10-20 system. The left mastoid electrode  
343 was used as reference electrode and the neck electrode was used as ground electrode.  
344 The electrodes were clustered into six regions of interest: a frontal left region (F7, F5,  
345 F3, FT7, FC5, and FC3), a frontal middle region (F1, FZ, F2, FC1, FCZ, and FC2), a frontal  
346 right region (F8, F6, F4, FT8, FC6, and FC4), a central left region (T7, C5, C3, TP7, CP5,  
347 and CP3), a central middle region (C1, Cz, C2, and CPZ), and a central right region (T8,  
348 C6, C4, TP8, CP6, and CP4). Horizontal and vertical electro-oculograms were recorded  
349 bipolarly through electrodes placed at the outer canthi of the eyes and above and below  
350 the right eye. Electrode impedance was kept  $< 5 \text{ k}\Omega$ . Signals were recorded with a 0.25–  
351 1,000-Hz bandpass filter and a 500-Hz sampling rate.

352

353 EEG data were analysed in EEGLAB 13 (Delorme & Makeig, 2004) in MATLAB  
354 R2018b (The MathWorks, Natick, Massachusetts). Continuous raw data files were re-  
355 referenced to the algebraic mean of the left and right mastoid electrodes and filtered  
356 with a 0.5-Hz high-pass filter and a 30-Hz low-pass filter implemented with finite

357 impulse response designs and Blackman windows of 550 points and 2,750 points,  
358 respectively. Channels with excessive noise were identified through visual inspection  
359 and interpolated when necessary. The mean number of interpolated channels per  
360 participant was 0.22. Independent component analysis was used for linear  
361 decomposition of continuous data to remove the contributions of artefacts affecting  
362 scalp sensors (e.g. slow drifts, eye blinks or movement, and muscle artefacts). Epochs  
363 were removed from further analyses if the amplitude changes exceeded  $\pm 45 \mu\text{V}$  in any  
364 channels, including the electro-oculograms (less than 10% of the trials). The epochs of  
365 target stimuli (cover tasks) were removed in the analysis. In the end, 97.2% (SD  $\pm 2.6\%$ )  
366 and 94.8% (SD  $\pm 8.0\%$ ) was preserved in the dyslexic and control groups, respectively.  
367 We also performed student's t-test between groups. There were no significant  
368 differences ( $t(37), 0.69, p=0.50$ ). Selective response averaging was conducted  
369 separately for standard triplets, triplets with a location deviant (but not with a  
370 statistical deviant), triplets with a statistical deviant (but not a location deviant), and  
371 triplets with both a location deviant and a statistical deviant (see 'Exposition  
372 Sequences').

373

374         Averages were computed using a 100 ms pre-stimulus baseline. We directly  
375 addressed the hypothesis of the present study, focusing on the average MMN  
376 amplitudes measured within a 150–250 ms time window. In addition, we analysed an  
377 obvious positive component approximately 100–140 ms after the onset of the stimuli,  
378 henceforth referred to as P120. That is, we also investigated the average amplitudes  
379 within a 100–140 ms time window.

380

## 381 ***Statistical Analysis***

### 382 *Between-Group Comparisons of Participant Characteristics*

383 Statistical analyses were conducted using jamovi version 1.2 (The jamovi Project,  
384 2020). We used Bonferroni-corrected *t*-tests (dividing 0.05 by the number of tests)  
385 when comparing demographic characteristics and scores on tests of intelligence,  
386 spelling skills, and reading abilities between the dyslexia and the control group.

387

### 388 *Analyses of Exposition Phase Data*

389 We used separate ANOVA models to analyse the effects of stimulus deviance on  
390 P120 and MMN effect amplitudes during the exposition phases. The sMMN response is  
391 had a smaller amplitude size compared with the location MMN. Further, the sMMN is a  
392 relatively new ERP component, for which the neural mechanism has not yet been  
393 elucidated in detail. To determine those neural generators, studies using fMRI or MEG  
394 would be most suited, however, such studies still are lacking despite many studies using  
395 EEG methodology. Thus, this study directly compared between standard and deviant  
396 but did not use the subtraction waveform that is typically used in MMN studies. One  
397 ANOVA model featured the within-participant factor of sound location (i.e., location  
398 standard triplet endings or location deviant triplet endings), and the other featured the  
399 within-participant factor of transitional probability (i.e., statistically standard triplet  
400 endings or statistically deviant triplet endings). Both ANOVA models included the  
401 between-participants factor of groups (i.e., the developmental dyslexia vs. the control  
402 group) and three within-participant factors: the distinction between ERP responses in  
403 the frontal vs. central areas of the brain; the distinction between ERP responses in the  
404 left, medial, and right areas of the brain (i.e., ERP response lateralisation); and the  
405 different experimental blocks. The posterior region was not included because of low

406 amplitude sizes. To boost our signal-to-noise ratio, our ANOVA models included three  
407 blocks rather than the actual six by merging the data from pairs of blocks.

408

409 We selected  $p < 0.05$  as our threshold for statistical significance and used a false  
410 discovery rate method for the post-hoc testing of significant effects. To determine  
411 whether the Rechtschreibtest and LVGT 5–12 scores correlated with the P120 and MMN  
412 effect amplitudes, we calculated Pearson correlation coefficients.

413

#### 414 *Analyses of Behavioural Testing Phase Data*

415 We used a two-tailed  $t$ -test to determine whether the frequency of correct answers  
416 during behavioural testing exceeded chance levels (i.e.,  $>.5$ ). We also used ANOVA  
417 models to compare the dyslexia and control groups in terms of response accuracies and  
418 reaction times (RT), and included experimental blocks as a within-subject factor in  
419 these analyses. As in our analyses of exposition phase data, we assumed three blocks  
420 rather than the actual six in order to boost our signal-to-noise ratios. We selected  $p < .05$   
421 as our threshold for statistical significance and used Bonferroni correction for the post-  
422 hoc testing of significant effects. We conducted Pearson correlation analysis to  
423 determine whether response accuracy rates correlated with confidence ratings and  
424 dyslexia test scores.

425

## 426 **Results**

### 427 *Participant Characteristics*

428 Relative to the control group, the developmental dyslexia group had lower  
429 average scores for spelling abilities, reading comprehension, and reading speed (Table

430 1). However, the two groups were comparable in terms of age and intelligence (age:  
431  $t(34) = 1.41, p = .167$ ; IQ:  $t(34) = .50, p = .620$ ).

432

### 433 ***EEG Results***

#### 434 *P120 and MMN Responses to Location Deviance*

435 First, we examined whether developmental dyslexia affects ERP responses to location  
436 deviants (only standards and deviants presented on high-probability triplet endings  
437 were included in this analysis). Location deviants elicited a P120 followed by a location  
438 MMN, which was maximal at anterior frontal electrodes (Figure 2a–b). The location  
439 MMN appeared in both the dyslexia and control groups, but had a smaller amplitude in  
440 the dyslexia group. Compared with the standards, the location deviants elicited larger  
441 P120 responses in the control group, whereas the location deviants did not elicit larger  
442 P120 responses in the dyslexia group (see Appendix B for mean P120 and location MMN  
443 amplitudes in each condition). These observations were reflected in an ANOVA,  
444 indicating a significant interaction between sound location (standard, deviant) and  
445 group for the P120:  $F(1, 34) = 5.52, p = .025, \eta^2_p = .14$ ; and the location MMN:  $F(1, 34) =$   
446  $5.16, p = .03, \eta^2_p = .13$ ; see the Appendix C for complete results. When analysing ERP  
447 responses separately in each group, location deviants elicited a significant location  
448 MMN in both the dyslexia group and the control group ( $p < .001$ ; Figure 2c). Compared  
449 with the standards, location deviants elicited larger P120 responses in the control group  
450 ( $p = .011$ ), but there was no significant difference in the dyslexia group ( $p = .49$ ). Higher  
451 spelling scores on the Rechtschreibtest correlated with larger location deviance-  
452 induced P120 effects ( $r = .37, p = .03$ ; see the Appendix C). No other correlations  
453 between language aptitude test scores and EEG responses were observed.

454

455 *P120 and MMN Responses to Statistical Deviance*

456       Next, we examined whether developmental dyslexia affects ERP responses to  
457 statistical deviants (only triplet endings without location change were included in this  
458 analysis). Statistical deviants elicited a P120, followed by a sMMN, which was maximal  
459 over anterior frontal electrodes (Figure 3a–b; see the Appendix B for mean amplitudes  
460 of the P120 and sMMN components in each condition). Statistical deviants elicited a  
461 P120 in both groups, and an sMMN in the control group but not in the dyslexia group.  
462 These observations were reflected in an ANOVA, indicating a significant interaction  
463 between transitional probability (high vs. low probability), frontal vs. central, and  
464 Group:  $F(1, 34) = 5.50, p = .025, \eta^2 p = .14$  (for complete results, see the Appendix D).  
465 Post-hoc tests revealed that the sMMN response at frontal electrodes was significant in  
466 the control group ( $p = .032$ ) but not in the dyslexia group ( $p = .74$ ; Figure 3c). At the  
467 central electrodes, the sMMN was not significant in both groups.

468

469       The effects of statistical learning on P120 amplitudes were prominent at medial  
470 electrodes (Figure 3b–c), as reflected by the significant interaction between transitional  
471 probability and lateralisation ( $F[2, 68] = 4.15, p = .020, \eta^2 p = .11$ ). Post-hoc tests  
472 revealed that the P120 responses to statistical deviants were larger than those to the  
473 standards at medial electrodes ( $p = .009$ ); however, no such effects were apparent in the  
474 left ( $p = .23$ ) or right region ( $p = .53$ ).

475

476       The effects of statistical learning on P120 amplitudes gradually increased as the  
477 experiment progressed to later blocks, as reflected by a significant interaction between  
478 transitional probability, lateralisation, and experimental blocks ( $F[4, 136] = 2.78, p =$

479 .029,  $\eta^2_p = .08$ ). Post-hoc tests revealed that the amplitudes of P120 responses to  
480 statistical deviants were larger in the third experimental block than in the first ( $p =$   
481 .002) and second blocks ( $p = .004$ ). Furthermore, in the analysis of ERP responses over  
482 the central region, the P120 response amplitudes elicited by statistical deviants were  
483 significantly different from those elicited by standards during the third block ( $p < .001$ );  
484 however, this was neither observed for the first ( $p = .15$ ) nor the second block ( $p = .85$ ).  
485

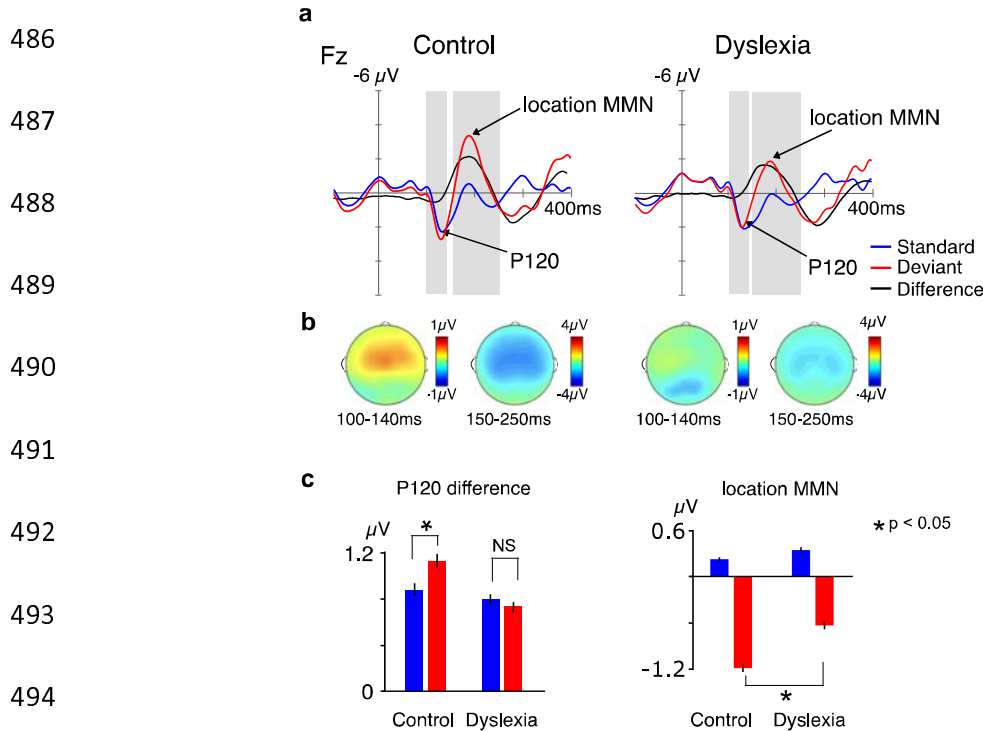

495 **Figure 2. Location MMN results.** (a) Mean ERP responses to triplet endings as  
496 recorded from the FZ electrode. Grey areas indicate the time windows used for  
497 quantifying the P120 (~100–140 ms) and location MMN (150–250 ms) components.  
498 Averaged ERP responses to location standard (blue) and deviant (red) triplet endings,  
499 as well as differences between them (black), are shown separately. (b) Isopotential  
500 maps showing the scalp distributions of differences between the ERPs evoked by  
501 location deviant triplet endings and those evoked by location standard triplet endings in  
502 the control (left) and dyslexia (right) groups. (c) Interactive effects of dyslexia and  
503 sound location at an anterior frontal region (average of F7, F5, F3, FT7, FC5, FC3, F1, FZ,  
504 F2, FC1, FCZ, FC2, F8, F6, F4, FT8, FC6, and FC4). Location deviant triplet endings  
505 elicited larger P120 amplitudes than location standard triplet endings in the control  
506 group, but this was not the case in the dyslexia group. Significant location MMN effects  
507 were observed in both groups but were larger in the control group than in the dyslexia



508 group. Error bars indicate the standard deviation of the mean. Abbreviations: ERP,  
509 event-related potential; location MMN, location mismatch negativity.

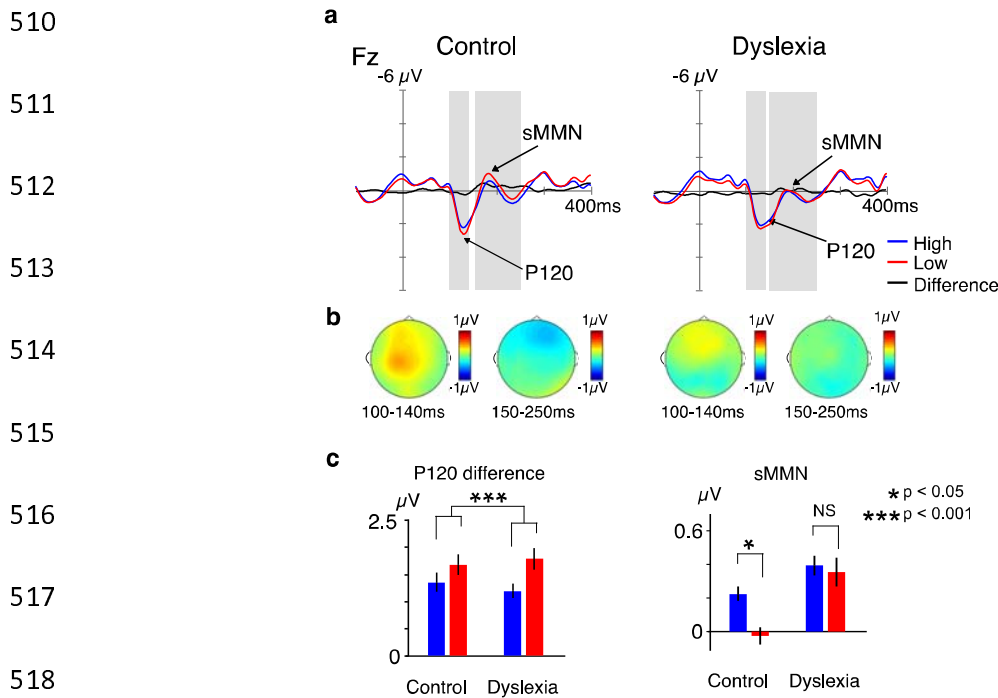

519 **Figure 3. Statistical MMN results.** (a) Mean ERP responses to triplet endings as  
520 recorded from the Fz electrode. The grey areas indicate the time windows used for  
521 quantifying the P120 (~100–140 ms) and sMMN (150–250 ms) component. Averaged  
522 ERP responses to statistically standard (blue) and deviant (red) triplet endings, as well  
523 as differences between them (black), are shown separately. (b) Isopotential maps  
524 showing the scalp distributions of differences between ERPs evoked by statistically  
525 deviant triplet endings and those evoked by statistically standard triplet endings. (c)  
526 Interactive effects of dyslexia and transitional probability at an anterior frontal region  
527 (average of F7, F5, F3, FT7, FC5, FC3, F1, FZ, F2, FC1, FCZ, FC2, F8, F6, F4, FT8, FC6, and  
528 FC4). In the medial electrodes, statistically deviant triplet endings elicited larger P120  
529 amplitudes than the statistically standard triplet endings in both groups. Significant  
530 sMMN effects were observed in anterior frontal brain areas in the control group, but no

531 sMMN effects were observed in the dyslexia group. Error bars indicate standard  
532 deviation of the mean. Abbreviations: ERP, event-related potential; sMMN, statistical  
533 mismatch negativity.

## 534 ***Behavioural Results***

535           During the exposition phase, the participants discovered on average 94.3% ( $SD =$   
536  $.02$ ) of the acoustical deviants (i.e., they showed a high performance in the cover task  
537 where participants had to detect high pitched tones). This indicates that the  
538 participants paid attention to the acoustical stimuli, while the task was relatively simple  
539 to carry out.

540

541           At the end of the exposition phase in each block, the participants listened to  
542 paired statistically deviant and standard triplets. A participant was asked to choose  
543 which triplet in the pair sounded more familiar and to rate their confidence in a given  
544 answer on a scale ranging from 1 (no certainty) to 5 (certainty). To evaluate the  
545 performance in the behavioural testing phase, we used a two-tailed  $t$ -test to determine  
546 whether the frequency of correct answers during behavioural testing exceeded chance  
547 levels (i.e.,  $p > .05$ ). Further, we used ANOVAs to compare response accuracies, RT, and  
548 confidence ratings between dyslexics and controls. ANOVAs were computed with Group  
549 (dyslexia vs. control) as a between-subjects factor and experiment block as a within-  
550 subject factor (three blocks; the first, second and third blocks, instead of the actual six  
551 blocks of the experiment to obtain a higher signal-to-noise ratio).

552

553           The two-tailed  $t$ -test revealed the frequency of correct answers was significantly  
554 higher than chance levels in the control group ( $p = .017$ ,  $Cohen's d = .325$ ) but not the  
555 dyslexic group ( $p = .520$ ). ANOVAs revealed no effects on response accuracies and  
556 confidence rating in both the dyslexia and control groups (Figure 4, and see Appendix  
557 E). As for the reaction time, a significant main effect of the experimental block was  
558 noted ( $F[2, 68] = 7.92$ ,  $p < .001$ ,  $\eta^2 p = .189$ ). Post-hoc tests revealed that the reaction

559 time in the second and last blocks was significantly faster than that in the first block

560 (2nd:  $p = .006$ ; 3rd:  $p < .001$ ). No other effect was found in the ANOVA of behavioural

561 results.

562

563 To determine whether response accuracy rates correlated with confidence

564 ratings, we also conducted a Pearson correlation analysis. Response accuracies did not

565 correlate with confidence ratings in both the control ( $r = -0.18$ ,  $p = .19$ ) and dyslexia ( $r$

566  $= -0.05$ ,  $p = .70$ ) groups. Similarly, response accuracies did not correlate with reading

567 and spelling test scores.

568

### Correctness ratios

569

570

571

572

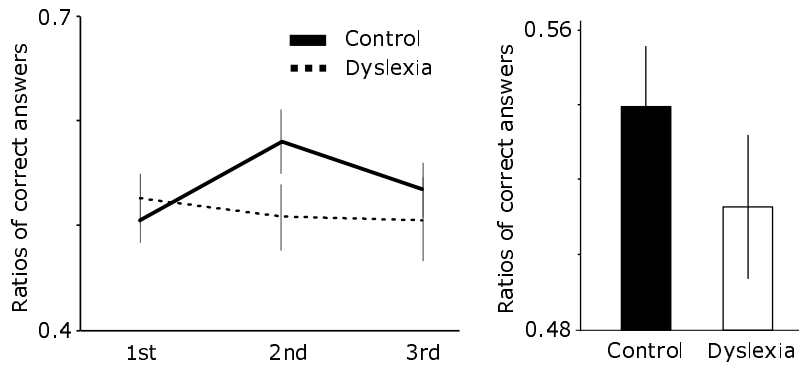

573

### Reaction time

574

575

576

577

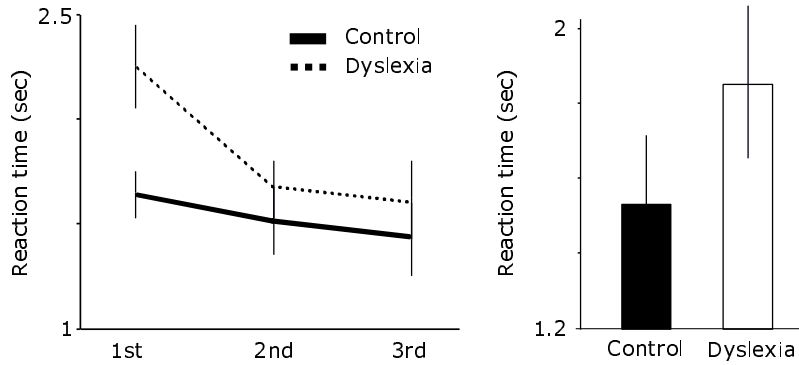

578 **Figure 4. Behavioural testing results across experimental blocks.** Error bars

579 indicate standard deviations. The ANOVA revealed no significance difference in

580 correctness ratios and reaction time between dyslexia and control groups.

## 581 **Discussion**

582 In this study, we assessed the relationship between developmental dyslexia and  
583 ERP responses to a continuous stream of sound triplets in which some triplet endings  
584 were either location deviants or statistical deviants. We found that statistical deviants  
585 elicited small sMMN and that location deviants elicited a large location MMN. Compared  
586 with controls, the participants with developmental dyslexia exhibited a smaller location  
587 MMN and no sMMN. Whereas there was a tendency to a higher proportion of correct  
588 responses and decreased reaction times in the control compared to the dyslexia  
589 group, there was no significant between-group difference for those two variables,  
590 reflecting the ability to learn the statistical characteristics of stimuli. Our findings  
591 indicate that the neural functions underlying the sMMN and the location MMN are  
592 impaired in individuals with developmental dyslexia. This is in agreement with previous  
593 evidence of a smaller MMN in developmental dyslexics (Gu & Bi, 2020; Lachmann et al.,  
594 2005; Neuhoff et al., 2012). Our findings also suggest that at the group level, the MMN  
595 may be more sensitive to mild difficulties than behavioural measures.

596

597 The location MMN is a response reflecting auditory perceptual memory  
598 operations that are instantly updated after new information is obtained (Bendixen,  
599 Prinz, Horváth, Trujillo-Barreto, & Schröger, 2008; Sussman & Winkler, 2001). The  
600 sMMN, on the other hand, relies on memory representations that are formed from the  
601 implicit knowledge of sequential statistical structure (i.e., knowledge of stimulus  
602 transitional probabilities; cf., e.g., Koelsch et al., 2016; Tsogli et al., 2019). Notably, the  
603 sMMN effects elicited in our experiment were maximal at anterior frontal electrodes  
604 (Figure 3b); however, the location MMN effect was more broadly distributed from

605 central to frontal areas (Figure 2b). This suggests the possibility that neural sources of  
606 the sMMN are different from those of the location MMN. However, our findings showed  
607 that people with dyslexia also exhibited smaller location MMN.

608         A past study found a diminished pitch MMN but an enhanced location MMN in  
609 dyslexia (Kujala et al., 2006). We assumed that the combination of location and  
610 statistical MMN in our paradigm may lead to different results from Kujala's study.

611         Another possibility is that the acoustic perceptual dysfunction of dyslexic  
612 individuals also influenced neural processing of a sMMN. For example, past studies have  
613 showed faster decay of dyslexics' perceptual memory trace behaviorally (Jaffe-Dax et al.,  
614 2017; Lieder et al., 2019) and in brain activity (Jaffe-Dax 2015, 2017), specifically in the  
615 auditory cortex (Gertsovski & Ahissar, 2022 Perrachione et al., 2016). They proposed  
616 that it reduces learning of complex rules (e.g. Virtala et al., 2021) and particularly  
617 hampers acquisition of categories (Gertsovski & Ahissar, 2022).

618

619         Both location MMN and sMMN were preceded by P120 responses. Compared  
620 with the controls, the participants with developmental dyslexia exhibited no difference  
621 in P120 responses between location deviants and standards. Previous studies have  
622 reported the atypicalities of the P1 component in sound processing and dyslexia  
623 (Stefanics et al., 2011) and implicit and statistical learning (Jaffe-Dax et al., 2017). The  
624 P120 found in our study may be a P1-like component in terms of the positive  
625 component temporally adjacent to the N1 or MMN effects. Further, given the  
626 fundamental differences in the memory system between ERPs elicited by statistically  
627 deviant stimuli and location deviants as stated above, the P120 components elicited by  
628 statistically deviant stimuli may also be distinguishable from those of the P120  
629 components elicited by location deviants. However, considering the difference in the

630 time window and that this effect was not hypothesised, it will not be discussed further  
631 until future studies replicate this effect. Further studies are therefore necessary to  
632 elucidate the neural basis underlying P120 components.

633

634 It has recently been considered that a domain-general statistical learning  
635 impairment, rather than a specific impairment in phonological processing (Ramus et al.,  
636 2003; Vellutino et al., 2004), may underlie developmental dyslexia. For example,  
637 individuals with developmental dyslexia show weaker domain-general statistical  
638 learning across sensory domains (Hung, Frost, & Pugh, 2018), such as auditory (Arciuli  
639 & Conway, 2018; Dobó et al., 2021; Gabay et al., 2015; Kahta & Schiff, 2019;  
640 Vandermosten et al., 2019) and visual stimuli (Sigurdardottir et al., 2017). Furthermore,  
641 statistical learning impairment in developmental dyslexia is not limited to speech  
642 stimuli but also occurs in non-speech stimuli (Plakas, van Zuijen, van Leeuwen,  
643 Thomson, & van der Leij, 2013). Our results support these past findings; our study  
644 explored effects of deviation from predictions based on physical and statistical  
645 properties using non-speech auditory stimuli, and our findings showed that statistical  
646 learning processes and basic auditory processes are affected in individuals with  
647 developmental dyslexia.

648

649 Some new theoretical frameworks have been proposed to explain statistical  
650 learning impairment in dyslexia. For example, a multicomponent memory network,  
651 referred to as the Statistical Learning and Reading (SLR) model (Lee et al., 2022),  
652 represents a domain-general system that consists of a short-term memory subsystem,  
653 an explicit declarative long-term memory subsystem, and an implicit procedural long-  
654 term memory subsystem. The two long-term memory subsystems are distinguishable in



655 terms of the attentional demands required for encoding and storage of information,  
656 with more controlled attention (i.e., a top-down selective attention to learning stimuli)  
657 than automatic attention (i.e., a bottom-up involuntary attention to salient stimuli)  
658 needed in the explicit declarative subsystem, and, conversely, more automatic attention  
659 than controlled attention needed in the implicit procedural subsystem. The model  
660 output is a statistically optimal representation as manifested by the neural and  
661 behavioural response of statistical learning and reading activities.

662

663         In this study, participants conducted the behavioural testing at the end of each  
664 block. In this experimental paradigm, it would be possible that they tended to pay more  
665 attention to the tone sequence in the later blocks since they anticipated they may  
666 experience a test later on. However, it is also important to see the time course of  
667 statistical learning effects. Indeed, this study detected that participants did not show  
668 statistical learning effects in the first block and a difference between groups. However,  
669 the difference gradually became larger particularly in the second block whereafter it  
670 stayed at about the same level (Figure 4, top). Further, the control group but not the  
671 dyslexic group showed an above-chance level in behavioral performance of statistical  
672 learning. However, no significant group difference may suggest the possibility that the  
673 two groups learned the sequence equally. Further research is necessary to reveal why  
674 and how the MMN is more sensitive to group difference than behavioural measures.

675

676         In conclusion, our findings lay forth evidence that location deviants elicit a  
677 distinct classical MMN, which was larger in controls than in individuals with  
678 developmental dyslexia. Statistical deviants elicited a sMMN in controls, whereas in  
679 individuals with developmental dyslexia, sMMN was not recognizable. Our findings add

680 to and are consistent with the so far scarce evidence showing that statistical learning  
681 and the underlying neural correlates may be impaired in individuals with  
682 developmental dyslexia. Thus, exploring those neural correlates may contribute to a  
683 better understanding of the cognitive processes underlying the acquisition of the rules  
684 and regularities that guide the arrangement of elements in ordered sequences such as  
685 language and music.

## 686 **References**

687 Ahissar, M., Protopapas, A., Reid, M., & Merzenich, M. M. (2000). Auditory processing  
688 parallels reading abilities in adults. *Proceedings of the National Academy of Sciences of*  
689 *the United States of America*, 97(12), 6832–6837.  
690 <https://doi.org/10.1073/pnas.97.12.6832>

691

692 Arciuli, J., & Conway, C. M. (2018). The promise-and challenge-of statistical learning for  
693 elucidating atypical language development. *Current Directions in Psychological Science*,  
694 27(6), 492–500. <https://doi.org/10.1177/0963721418779977>

695

696 Arciuli, J., & Simpson, I. C. (2012). Statistical learning is related to reading ability in  
697 children and adults. *Cognitive Science*, 36(2), 286–304. [https://doi.org/10.1111/j.1551-](https://doi.org/10.1111/j.1551-6709.2011.01200.x)  
698 [6709.2011.01200.x](https://doi.org/10.1111/j.1551-6709.2011.01200.x)

699

700 Bendixen, A., Prinz, W., Horváth, J., Trujillo-Barreto, N. J., & Schröger, E. (2008). Rapid  
701 extraction of auditory feature contingencies. *NeuroImage*, 41(3), 1111–1119.  
702 <https://doi.org/10.1016/j.neuroimage.2008.03.040>

703

704 Bishop, D. V. M. (2007). Using mismatch negativity to study central auditory processing  
705 in developmental language and literacy impairments: where are we, and where should  
706 we be going?. *Psychological Bulletin*, 133(4), 651. [https://doi.org/10.1037/0033-](https://doi.org/10.1037/0033-2909.133.4.651)  
707 [2909.133.4.651](https://doi.org/10.1037/0033-2909.133.4.651)

708

709 Bruder, J., Leppänen, P. H., Bartling, J., Csépe, V., Démonet, J. F., & Schulte-Körne, G.  
710 (2011). Children with dyslexia reveal abnormal native language representations:  
711 Evidence from a study of mismatch negativity. *Psychophysiology*, 48(8), 1107-1118.  
712 <https://doi.org/10.1111/j.1469-8986.2011.01179.x>

713

714 Christmann, C. A., Lachmann, T., & Steinbrink, C. (2015). Evidence for a general auditory  
715 processing deficit in developmental dyslexia from a discrimination paradigm using  
716 speech versus nonspeech sounds matched in complexity. *Journal of Speech Language  
717 and Hearing Research*, 58(1), 107-121. [https://doi.org/10.1044/2014\\_jslhr-l-14-0174](https://doi.org/10.1044/2014_jslhr-l-14-0174)

718

719 Christmann, C. A., Lachmann, T., & Berti, S. (2014). Earlier timbre processing of  
720 instrumental tones compared to equally complex spectrally rotated sounds as revealed  
721 by the mismatch negativity. *Neuroscience Letters*, 581, 115–119.  
722 <https://doi.org/10.1016/j.neulet.2014.08.035>

723

724 Clark, K. A., Helland, T., Specht, K., Narr, K. L., Manis, F. R., Toga, A. W., & Hugdahl, K.  
725 (2014). Neuroanatomical precursors of dyslexia identified from pre-reading through to  
726 age 11. *Brain*, 137(12), 3136–3141. <https://doi.org/10.1093/brain/awu229>

727

728 Cunillera, T., Toro, J. M., Sebastián-Gallés, N., & Rodríguez-Fornells, A. (2006). The effects  
729 of stress and statistical cues on continuous speech segmentation: An event-related brain  
730 potential study. *Brain Research*, 1123(1), 168–178.  
731 <https://doi.org/10.1016/j.brainres.2006.09.046>

732

- 733 Daikoku, T., Yatomi, Y., & Yumoto, M. (2017). Statistical learning of an auditory sequence  
734 and reorganization of acquired knowledge: A time course of word segmentation and  
735 ordering. *Neuropsychologia*, 95, 1–10.  
736 <https://doi.org/10.1016/j.neuropsychologia.2016.12.006>  
737
- 738 Daikoku, T. (2018). Neurophysiological markers of statistical learning in music and  
739 language: hierarchy, entropy, and uncertainty. *Brain Sciences*, 8(6), 114.  
740 <https://doi.org/10.3390/brainsci8060114>  
741
- 742 De Diego Balaguer, R., Toro, J.M., Rodriguez-Fornells, A., & Bachoud-Lévi, A.C. (2007).  
743 Different neurophysiological mechanisms underlying word and rule extraction from  
744 speech. *PLoS ONE*, 2(11), e1175. <https://doi.org/10.1371/journal.pone.0001175>  
745
- 746 Delorme, A., & Makeig, S. (2004). EEGLAB: an open source toolbox for analysis of single-  
747 trial EEG dynamics including independent component analysis. *Journal of Neuroscience*  
748 *Methods*, 134(1), 9–21. <https://doi.org/10.1016/j.jneumeth.2003.10.009>  
749
- 750 Dobó, D., Lukics, K. S., Szöllősi, Á., Németh, K., & Lukács, Á. (2021). Statistical learning  
751 and the effect of starting small in developmental dyslexia. *Journal of Speech, Language,*  
752 *and Hearing Research*, 64(5), 1621–1635. [https://doi.org/10.1044/2020\\_JSLHR-20-](https://doi.org/10.1044/2020_JSLHR-20-00145)  
753 [00145](https://doi.org/10.1044/2020_JSLHR-20-00145)  
754
- 755 Du, W., & Kelly, S. W. (2013). Implicit sequence learning in dyslexia: a within-sequence  
756 comparison of first- and higher-order information. *Annals of Dyslexia*, 63(2), 154–170.  
757 <https://doi.org/10.1007/s11881-012-0077-1>

758

759 Evans, J. L., Saffran, J. R., & Robe-Torres, K. (2009). Statistical learning in children with  
760 specific language impairment. *Journal of Speech, Language, and Hearing Research*, *52*(2),  
761 321–335. [https://doi.org/10.1044/1092-4388\(2009/07-0189\)](https://doi.org/10.1044/1092-4388(2009/07-0189))

762

763 François, C., Chobert, J., Besson, M., & Schön, D. (2013). Music training for the  
764 development of speech segmentation. *Cerebral Cortex*, *23*(9), 2038–2043.  
765 <https://doi.org/10.1093/cercor/bhs180>

766

767 François, C., Cunillera, T., Garcia, E., Laine, M., & Rodriguez-Fornells, A. (2017).  
768 Neurophysiological evidence for the interplay of speech segmentation and word-  
769 referent mapping during novel word learning. *Neuropsychologia*, *98*, 56–67.  
770 <https://doi.org/10.1016/j.neuropsychologia.2016.10.006>

771

772 Gabay, Y., Thiessen, E. D., & Holt, L. L. (2015). Impaired statistical learning in  
773 developmental dyslexia. *Journal of Speech, Language, and Hearing Research*, *58*(3), 934–  
774 945. [https://doi.org/10.1044/2015\\_JSLHR-L-14-0324](https://doi.org/10.1044/2015_JSLHR-L-14-0324)

775

776 Garrido, M. I., Friston, K. J., Kiebel, S. J., Stephan, K. E., Baldeweg, T., & Kilner, J. M. (2008).  
777 The functional anatomy of the MMN: a DCM study of the roving paradigm. *NeuroImage*,  
778 *42*(2), 936–944. <https://doi.org/10.1016/j.neuroimage.2008.05.018>

779

780 Gertsovski, A., & Ahissar, M. (2022). Reduced learning of sound categories in dyslexia is  
781 associated with reduced regularity-induced auditory cortex adaptation. *Journal of*  
782 *Neuroscience*, *42*(7), 1328–1342. <https://doi.org/10.1523/jneurosci.1533-21.2021>

783

784 Giraud, A. L., & Ramus, F. (2013). Neurogenetics and auditory processing in  
785 developmental dyslexia. *Current Opinion in Neurobiology*, 23(1), 37–42.  
786 <https://doi.org/10.1016/j.conb.2012.09.003>

787

788 Goswami, U. (2014). The neural basis of dyslexia may originate in primary auditory  
789 cortex. *Brain*, 137(12), 3100–3102. <https://doi.org/10.1093/brain/awu296>

790

791 Gu, C., & Bi, H. Y. (2020). Auditory processing deficit in individuals with dyslexia: A  
792 meta-analysis of mismatch negativity. *Neuroscience & Biobehavioral Reviews*, 116, 396-  
793 405. <https://doi.org/10.1016/j.neubiorev.2020.06.032>

794

795 Howard, J. H., Jr., Howard, D. V., Japikse, K. C., & Eden, G. F. (2006). Dyslexics are  
796 impaired on implicit higher-order sequence learning, but not on implicit spatial context  
797 learning. *Neuropsychologia*, 44(7), 1131–1144.  
798 <https://doi.org/10.1016/j.neuropsychologia.2005.10.015>

799

800 Huettig, F., Lachmann, T., Reis, A., & Petersson, K. M. (2017). Distinguishing cause from  
801 effect - Many deficits associated with developmental dyslexia may be a consequence of  
802 reduced and suboptimal reading experience. *Language, Cognition and Neuroscience*, 33,  
803 333-350. <https://doi.org/10.1080/23273798.2017.1348528>

804

805 Hung, Y. H., Frost, S. J., & Pugh, K. R. (2018). Domain generality and specificity of  
806 statistical learning and its relation with reading ability. In T. Lachmann & T. Weis (Eds.),

807 *Reading and dyslexia. Literacy studies (perspectives from cognitive neurosciences,*  
808 *linguistics, psychology and education)*, 16 (pp. 33–55). New York: Springer.

809

810 Ibrahimović, N., & Bulheller, S. (2013), *Rechtschreibtest RST-ARR: Aktuelle*  
811 *Rechtschreibregelung: Lückendiktate*. [London: Pearson assessment and information].

812

813 Jaffe-Dax, S., Frenkel, O., & Ahissar, M. (2017). Dyslexics' faster decay of implicit memory  
814 for sounds and words is manifested in their shorter neural adaptation. *eLife*, 6, e20557.

815 <https://doi.org/https://doi.org/10.7554/eLife.20557>

816

817 Jaffe-Dax, S., Kimel, E., & Ahissar, M. (2018). Shorter cortical adaptation in dyslexia is  
818 broadly distributed in the superior temporal lobe and includes the primary auditory

819 cortex. *eLife*, 7, e30018. <https://doi.org/10.7554/eLife.30018>

820

821 Jamovi Project. (2020). *Jamovi* (version 1.2) [Computer Software]. Retrieved from

822 <https://www.jamovi.org>

823

824 Kahta, S., & Schiff, R. (2019). Deficits in statistical leaning of auditory sequences among  
825 adults with dyslexia. *Dyslexia*, 25(2), 142–157. <https://doi.org/10.1002/dys.1618>

826

827 Koelsch, S., Busch, T., Jentschke, S., & Rohrmeier, M. (2016). Under the hood of statistical  
828 learning: a statistical MMN reflects the magnitude of transitional probabilities in

829 auditory sequences. *Scientific Reports*, 6, 19741. <https://doi.org/10.1038/srep19741>

830



831 Kujala, T., Lovio, R., Lepistö, T., Laasonen, M., & Näätänen, R. (2006). Evaluation of multi-  
832 attribute auditory discrimination in dyslexia with the mismatch negativity. *Clinical*  
833 *Neurophysiology*, 117(4), 885-893. <https://doi.org/10.1016/j.clinph.2006.01.002>

834

835 Kujala, T., Myllyviita, K., Tervaniemi, M., Alho, K., Kallio, J., & Näätänen, R. (2000). Basic  
836 auditory dysfunction in dyslexia as demonstrated by brain activity measurements.  
837 *Psychophysiology*, 37(2), 262-266. <https://doi.org/10.1111/1469-8986.3720262>

838

839 Lachmann, T., Berti, S., Kujala, T., & Schröger, E. (2005). Diagnostic subgroups of  
840 developmental dyslexia have different deficits in neural processing of tones and  
841 phonemes. *International Journal of Psychophysiology*, 56(2), 105-120.

842 <https://doi.org/10.1016/j.ijpsycho.2004.11.005>

843

844 Lachmann, T., & van Leeuwen, C. (2008). Different letter-processing strategies in  
845 diagnostic subgroups of developmental dyslexia. *Cognitive Neuropsychology*, 25, 730-  
846 744. <https://doi.org/10.1080/02643290802309514>

847

848 Lee, M-K. S., Cui, Y., & Tong, X., (2022). Toward a model of statistical learning and  
849 reading: Evidence from a meta-analysis. *Review of Educational Research*.

850 <https://doi.org/10.1080/02643290802309514>

851

852 Lieder, I., Adam, V., Frenkel, O., Jaffe-Dax, S., Sahani, M., & Ahissar, M. (2019). Perceptual  
853 bias reveals slow-updating in autism and fast-forgetting in dyslexia. *Nature*  
854 *Neuroscience*, 22(2), 256-264. <https://doi.org/10.1038/s41593-018-0308-9>

855

856 Lindgren, S. D., De Renzi, E., & Richman, L. C. (1985). Cross-national comparisons of  
857 developmental dyslexia in Italy and the United States. *Child Development*, 56(6), 1404–  
858 1417. <https://doi.org/10.2307/1130460>

859

860 McAnally, K. I., & Stein, J. F. (1996). Auditory temporal coding in dyslexia. *Proceedings*.  
861 *Biological Sciences*, 263(1373), 961–965. <https://doi.org/10.1098/rspb.1996.0142>

862

863 Menghini, D., Hagberg, G. E., Caltagirone, C., Petrosini, L., & Vicari, S. (2006). Implicit  
864 learning deficits in dyslexic adults: an fMRI study. *NeuroImage*, 33(4), 1218–1226.  
865 <https://doi.org/10.1016/j.neuroimage.2006.08.024>

866

867 Moldwin, T., Schwartz, O., & Sussman, E. S. (2017). Statistical learning of melodic  
868 patterns influences the brain's response to wrong notes. *Journal of Cognitive*  
869 *Neuroscience*, 29(12), 2114–2122. <https://doi.org/10.1162/jocn.a.01181>

870

871 Neuhoff, N., Bruder, J., Bartling, J., Warnke, A., Remschmidt, H., Müller-Myhsok, B., &  
872 Schulte-Körne, G. (2012). Evidence for the late MMN as a neurophysiological  
873 endophenotype for dyslexia. *PLOS ONE*, 7(5), e34909.  
874 <https://doi.org/10.1371/journal.pone.0034909>

875

876 Oldfield, R. C. (1971). The assessment and analysis of handedness: the Edinburgh  
877 inventory. *Neuropsychologia*, 9(1), 97–113. [https://doi.org/10.1016/0028-](https://doi.org/10.1016/0028-3932(71)90067-4)  
878 [3932\(71\)90067-4](https://doi.org/10.1016/0028-3932(71)90067-4)

879

880 Paavilainen, P., Karlsson, M. L., Reinikainen, K., & Näätänen, R. (1989). Mismatch  
881 negativity to change in spatial location of an auditory stimulus. *Electroencephalography*  
882 *and Clinical Neurophysiology*, 73(2), 129–141. [https://doi.org/10.1016/0013-](https://doi.org/10.1016/0013-4694(89)90192-2)  
883 [4694\(89\)90192-2](https://doi.org/10.1016/0013-4694(89)90192-2)

884

885 Paraskevopoulos, E., Kuchenbuch, A., Herholz, S. C., & Pantev, C. (2012). Statistical  
886 learning effects in musicians and non-musicians: an MEG study. *Neuropsychologia*,  
887 50(2), 341–349. <https://doi.org/10.1016/j.neuropsychologia.2011.12.007>

888

889 Perrachione, T. K., Del Tufo, S. N., Winter, R., Murtagh, J., Cyr, A., Chang, P., ... & Gabrieli, J.  
890 D. (2016). Dysfunction of rapid neural adaptation in dyslexia. *Neuron*, 92(6), 1383–1397.

891 <https://doi.org/10.1016/j.neuron.2016.11.020>

892

893 Perruchet, P., & Pacton, S. (2006). Implicit learning and statistical learning: one  
894 phenomenon, two approaches. *Trends in Cognitive Sciences*, 10(5), 233–238.

895 <https://doi.org/10.1016/j.tics.2006.03.006>

896

897 Plakas, A., van Zuijen, T., van Leeuwen, T., Thomson, J. M., & van der Leij, A. (2013).  
898 Impaired non-speech auditory processing at a pre-reading age is a risk-factor for  
899 dyslexia but not a predictor: an ERP study. *Cortex; a Journal Devoted to the Study of the*

900 *Nervous System and Behavior*, 49(4), 1034–1045.

901 <https://doi.org/10.1016/j.cortex.2012.02.013>

902

- 903 Ramus, F., Rosen, S., Dakin, S. C., Day, B. L., Castellote, J. M., White, S., & Frith, U. (2003).  
904 Theories of developmental dyslexia: insights from a multiple case study of dyslexic  
905 adults. *Brain*, *126*(4), 841-865. <https://doi.org/10.1093/brain/awg076>  
906
- 907 Raven, J. C., & Court, J. H. (1998), *Raven's progressive matrices and vocabulary scales*.  
908 Oxford, England: Oxford Psychologists Press.  
909
- 910 Rinne, T., Antila, S., & Winkler, I. (2001). Mismatch negativity is unaffected by top-down  
911 predictive information. *NeuroReport*, *12*(10), 2209–2213.  
912 <https://doi.org/10.1097/00001756-200107200-00033>  
913
- 914 Saffran, J. R., Aslin, R. N., & Newport, E. L. (1996). Statistical learning by 8-month-old  
915 infants. *Science*, *274*(5294), 1926–1928.  
916 <https://doi.org/10.1126/science.274.5294.1926>  
917
- 918 Sams, M., Paavilainen, P., Alho, K., & Näätänen, R. (1985). Auditory frequency  
919 discrimination and event-related potentials. *Electroencephalography and Clinical*  
920 *Neurophysiology*, *62*(6), 437–448. [https://doi.org/10.1016/0168-5597\(85\)90054-1](https://doi.org/10.1016/0168-5597(85)90054-1)  
921
- 922 Sanders, L. D., Newport, E. L., & Neville, H. J. (2002). Segmenting nonsense: An event-  
923 related potential index of perceived onsets in continuous speech. *Nature Neuroscience*,  
924 *5*(7), 700–703. <https://doi.org/https://doi.org/10.1038/nn873>  
925
- 926 Schneider, W., Schlagmüller, M., & Ennemoser, M. (2017), *LGVT 5–12+*:  
927 Lesegeschwindigkeits-und-verständnistest für die Klassen 5-12 (Manual). Hogrefe.

928

929 Schulte-Körne, G., Deimel, W., Bartling, J., & Remschmidt, H. (2001). Speech perception  
930 deficit in dyslexic adults as measured by mismatch negativity (MMN). *International*  
931 *Journal of Psychophysiology*, 40(1), 77–87. [https://doi.org/10.1016/s0167-](https://doi.org/10.1016/s0167-8760(00)00152-5)  
932 [8760\(00\)00152-5](https://doi.org/10.1016/s0167-8760(00)00152-5)

933

934 Shepard, R. N. (1964). Attention and the metric structure of the stimulus space. *Journal*  
935 *of Mathematical Psychology*, 1(1), 54–87. [https://doi.org/10.1016/0022-](https://doi.org/10.1016/0022-2496(64)90017-3)  
936 [2496\(64\)90017-3](https://doi.org/10.1016/0022-2496(64)90017-3)

937

938 Skoe, E.; Krizman, J., Spitzer, E., & Kraus, N. (2015) Prior experience biases subcortical  
939 sensitivity to sound patterns. *Journal of Cognitive Neuroscience*, 27(1), 124–140.  
940 [https://doi.org/10.1162/jocn\\_a\\_00691](https://doi.org/10.1162/jocn_a_00691)

941

942 Sigurdardottir, H. M., Danielsdottir, H. B., Gudmundsdottir, M., Hjartarson, K. H.,  
943 Thorarinsdottir, E. A., & Kristjánsson, Á. (2017). Problems with visual statistical  
944 learning in developmental dyslexia. *Scientific Reports*, 7(1), 606.  
945 <https://doi.org/10.1038/s41598-017-00554-5>

946

947 Sperling, A. J., Lu, Z. L., Manis, F. R., & Seidenberg, M. S. (2005). Deficits in perceptual  
948 noise exclusion in developmental dyslexia. *Nature Neuroscience*, 8(7), 862–863.  
949 <https://doi.org/10.1038/nn1474>

950

951 Stefanics, G., Fosker, T., Huss, M., Mead, N., Szucs, D., & Goswami, U. (2011). Auditory  
952 sensory deficits in developmental dyslexia: a longitudinal ERP study. *NeuroImage*,  
953 *57*(3), 723–732. <https://doi.org/10.1016/j.neuroimage.2011.04.005>

954

955 Sussman, E., & Winkler, I. (2001). Dynamic sensory updating in the auditory system.  
956 *Brain Research. Cognitive Brain Research*, *12*(3), 431–439.  
957 [https://doi.org/10.1016/s0926-6410\(01\)00067-2](https://doi.org/10.1016/s0926-6410(01)00067-2)

958

959 Sussman, E., Winkler, I., & Schröger, E. (2003). Top-down control over involuntary  
960 attention switching in the auditory modality. *Psychonomic Bulletin and Review*, *10*(3),  
961 630–637. <https://doi.org/10.3758/bf03196525>

962

963 Teinonen, T., Fellman, V., Näätänen, R., Alku, P., & Huotilainen, M. (2009). Statistical  
964 language learning in neonates revealed by event-related brain potentials. *BMC*  
965 *Neuroscience*, *10*, 21. <https://doi.org/10.1186/1471-2202-10-21>

966

967 Tong, X., Wang, Y., & Tong, S. X. (2020a). Neurocognitive correlates of statistical learning  
968 of orthographic-semantic connections in Chinese adult learners. *Neuroscience Bulletin*,  
969 *36*(8), 895–906. <https://doi.org/10.1007/s12264-020-00500-y>

970

971 Tong, X., Wang, Y., & Tong, S. X. (2020b). The neural signature of statistical learning of  
972 orthography. *Frontiers in Human Neuroscience*, *14*, 26.  
973 <https://doi.org/10.3389/fnhum.2020.00026>

974

- 975 Tsogli, V., Jentschke, S., Daikoku, T., & Koelsch, S. (2019). When the statistical MMN  
976 meets the physical MMN. *Scientific Reports*, 9(1), 5563.  
977 <https://doi.org/10.1038/s41598-019-42066-4>  
978
- 979 van Witteloostuijn, M., Boersma, P., Wijnen, F., & Rispens, J. (2019). Statistical learning  
980 abilities of children with dyslexia across three experimental paradigms. *PLOS ONE*,  
981 14(8), e0220041. <https://doi.org/10.1371/journal.pone.0220041>  
982
- 983 Vandermosten, M., Wouters, J., Ghesquière, P., & Golestani, N. (2019) Statistical learning  
984 of speech sounds in dyslexic and typical reading children. *Scientific Studies of Reading*,  
985 23, 116–127. <https://doi.org/10.1080/10888438.2018.1473404>  
986
- 987 Vellutino, F. R., Fletcher, J. M., Snowling, M. J., & Scanlon, D. M. (2004). Specific reading  
988 disability (dyslexia): What have we learned in the past four decades?. *Journal of Child*  
989 *Psychology and Psychiatry*, 45(1), 2-40. [https://doi.org/10.1046/j.0021-](https://doi.org/10.1046/j.0021-9630.2003.00305.x)  
990 [9630.2003.00305.x](https://doi.org/10.1046/j.0021-9630.2003.00305.x)  
991
- 992 Vicari, S., Finzi, A., Menghini, D., Marotta, L., Baldi, S., & Petrosini, L. (2005). Do children  
993 with developmental dyslexia have an implicit learning deficit? *Journal of Neurology*,  
994 *Neurosurgery, and Psychiatry*, 76(10), 1392–1397.  
995 <https://doi.org/10.1136/jnnp.2004.061093>  
996
- 997 Virtala, P., Partanen, E., & Kujala, T. (2021). Impaired perception and neural processing  
998 of rules in developmental dyslexia. *Journal of Learning Disabilities*, 54(6), 452-465.  
999 <https://doi.org/10.1177/0022219420988004>

1000

1001 Winkler, I., & Czigler, I. (2012). Evidence from auditory and visual event-related  
1002 potential (ERP) studies of deviance detection (MMN and vMMN) linking predictive  
1003 coding theories and perceptual object representations. *International Journal of*  
1004 *Psychophysiology*, 83(2), 132–143. <https://doi.org/10.1016/j.ijpsycho.2011.10.001>



1005 **Tables**

1006 **Table 1. Demographic and diagnostic data (raw scores) in the control and**  
1007 **dyslexia groups.**

|                           | Control         | Dyslexia        | <i>t</i> (34) | <i>p</i> | <i>Cohen's</i><br><i>d</i> |
|---------------------------|-----------------|-----------------|---------------|----------|----------------------------|
| N (females)               | 19 (13)         | 17 (12)         |               |          |                            |
| Age                       | 25.6 (±3.3)     | 23.8 (±4.2)     | 1.41          | .167     | .472                       |
| Intelligence              | 28.0 (±3.7)     | 27.0 (±3.9)     | 0.79          | .436     | .263                       |
| Spelling                  | 70.8 (±4.1)     | 46.5 (±9.6)     | 9.71          | <.001    | 3.373                      |
| Text reading              |                 |                 |               |          |                            |
| Reading                   | 48.5 (±10.6)    | 32.5 (±8.9)     | 4.91          | <.001    | 1.637                      |
| Comprehension             |                 |                 |               |          |                            |
| Reading Speed             | 1190.7 (±232.8) | 803.94 (±202.4) | 5.29          | <.001    | 1.766                      |
| (number<br>of read words) |                 |                 |               |          |                            |

1008 Note. Averages are reported as mean ± standard deviation. The intelligence scores and  
1009 spelling and reading test scores are raw scores.

1010

1011

1012 **Table 2. The 2x2 types of triplet endings based on location and statistical**  
1013 **constraints.**

|          |                | Transition probability |                          |
|----------|----------------|------------------------|--------------------------|
|          |                | High (90%)             | Low (10%)                |
| Sound    | Standard (80%) | Standards (72%)        | Statistical Deviant (8%) |
| Location | Deviant (20%)  | Location Deviant (18%) | Double Deviant (2%)      |

1014

1015

1016 **Extended data**

1017

1018 **Appendix B. Mean ERP amplitudes under different conditions.** ERP, event-related

1019 potential.

1020

1021 **Appendix C. ANOVA results for the effects of location deviance.** (a) Correlation

1022 analysis and ANOVA results for P120 component amplitudes and (b) ANOVA results for

1023 location MMN effects. Location MMN, location mismatch negativity.

1024

1025 **Appendix D. ANOVA results for the effects of statistical deviance.** (a) ANOVA results

1026 for P120 component amplitudes and (b) sMMN effects. sMMN, statistical mismatch

1027 negativity.

1028

1029 **Appendix E. ANOVA results for data from a behavioural test assessing the**

1030 **statistical learning of stimulus characteristics.**
